# Supplementary material for: The multiscale solvation effect on the reactivity of β-O-4 of lignin dimers in deep eutectic solvents
Source: Royal Society of Chemistry journal article supplement (doi:10.1039/d1cp04342k), 2021-01-01
Supplement: d1cp04342k1.pdf [file d1cp04342k1.pdf]

# **Multiscale Solvation Effect on Reactivity of $\beta$ -O-4 of Lignin Dimers in Deep Eutectic Solvents**

**Qi Qiao<sup>a</sup>, Jian Shi<sup>b</sup>, Qing Shao<sup>a\*</sup>**

<sup>a</sup>Department of Chemical and Materials Engineering, University of Kentucky, Lexington,  
Kentucky 40506, United States. E-mail: qshao@uky.edu

<sup>b</sup>Department of Biosystems and Agricultural Engineering, University of Kentucky, Lexington,  
Kentucky 40506, United States.

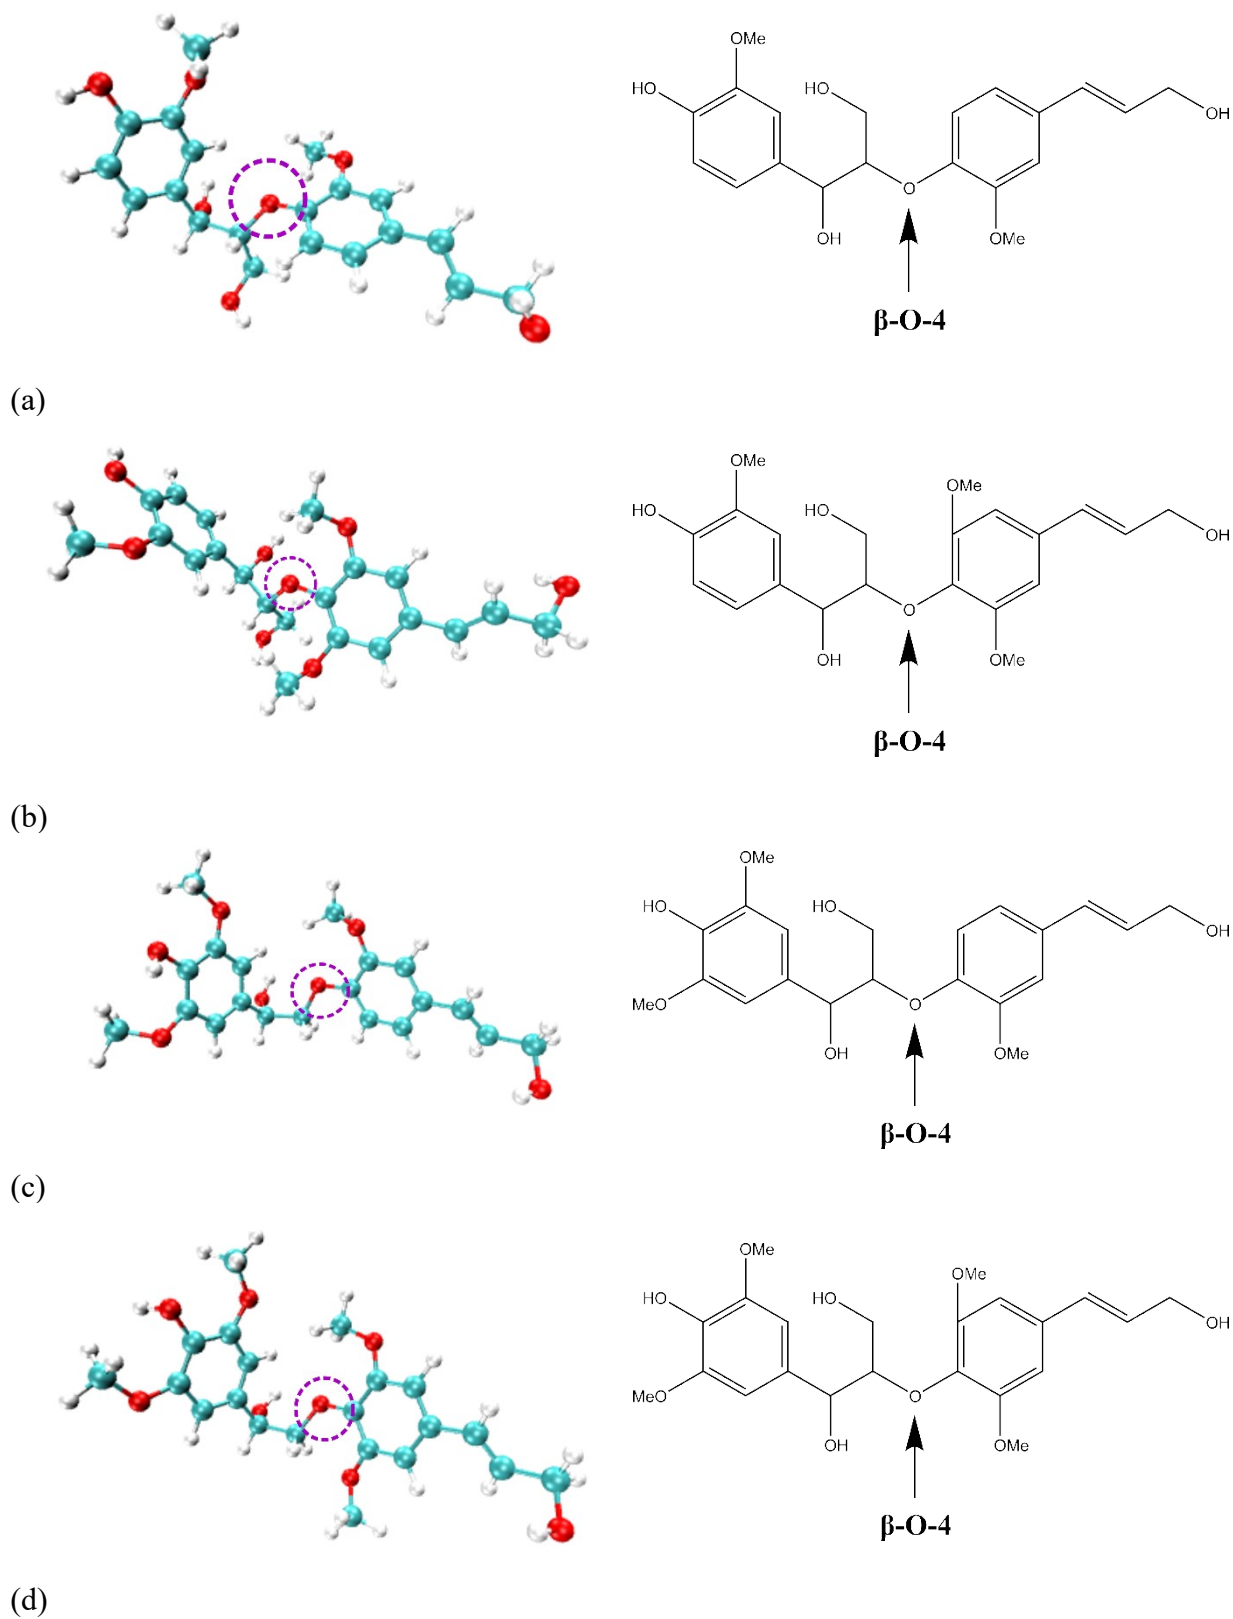

**Figure S1.** The configuration and chemical sketch of (a) G-G, (b) G-S, (c) S-G and (d) S-S lignin dimer.

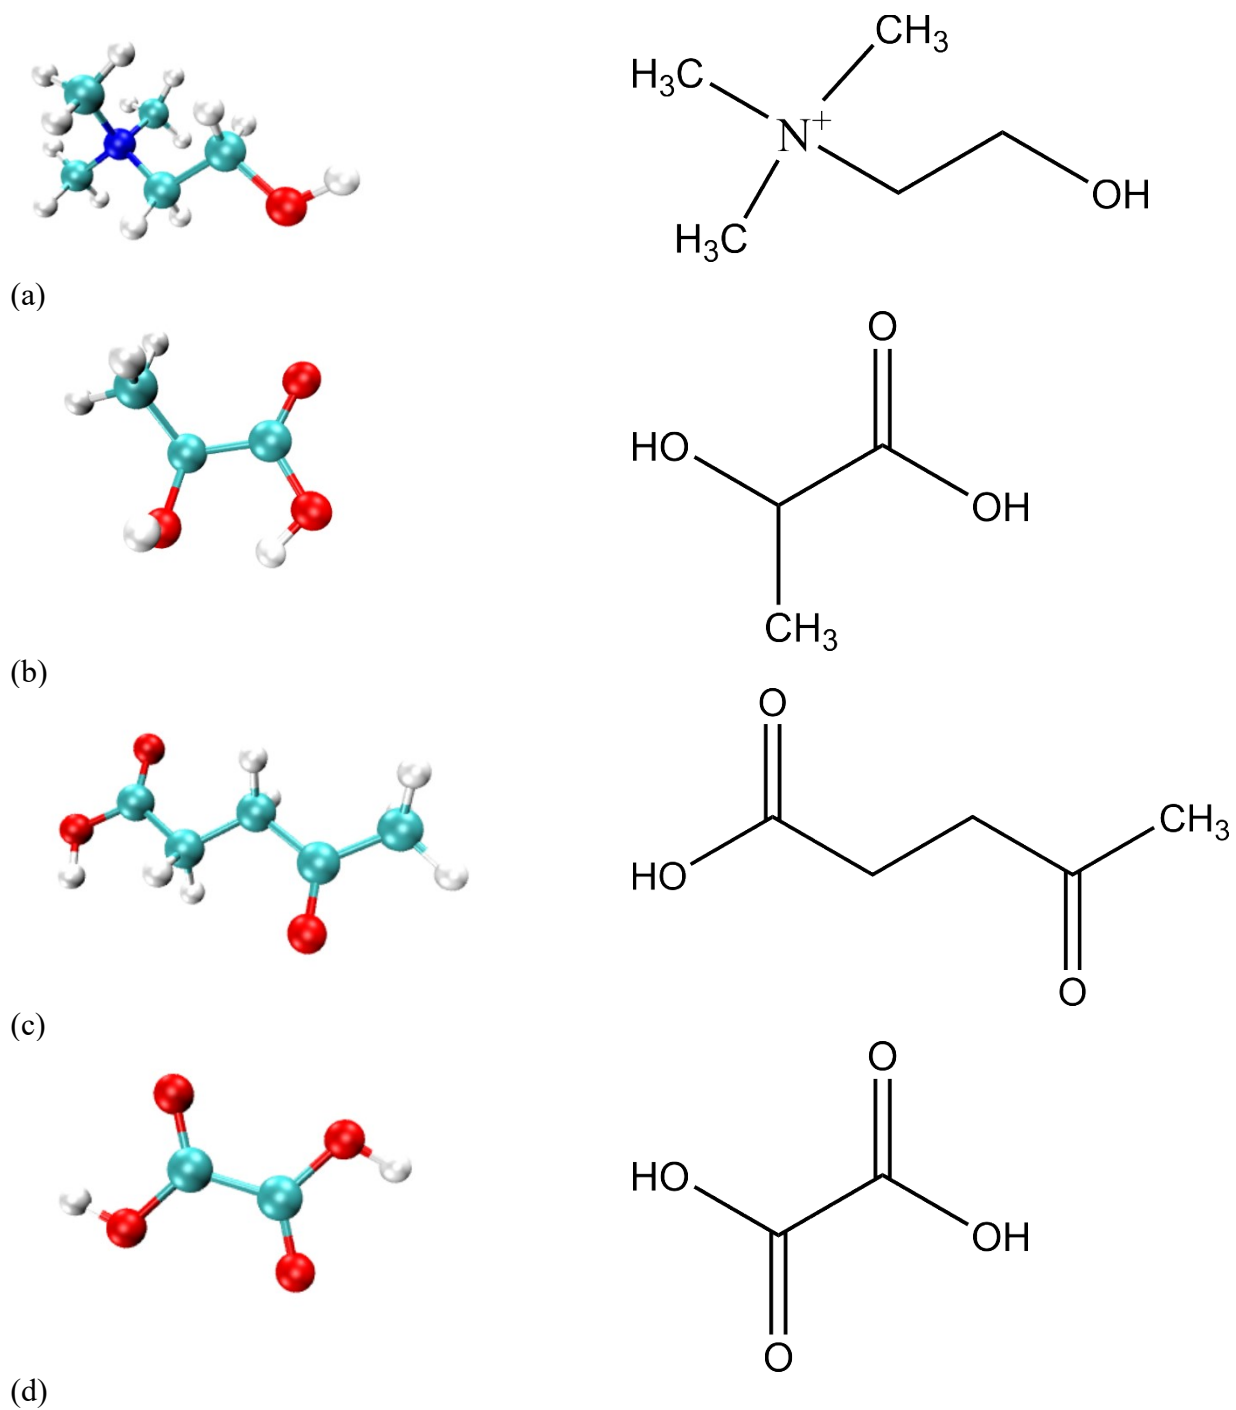

**Figure S2.** The configuration and chemical sketch of (a) choline, (b) lactic acid, (c) levulinic acid and (d) oxalic acid.

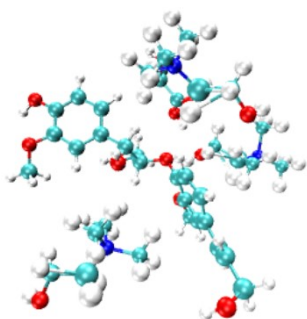

(a) G-G-Lac12

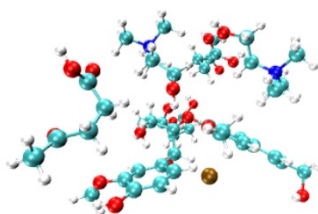

(b) G-G-Lev12

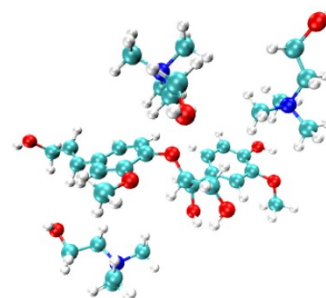

(c) G-G-Oxa11

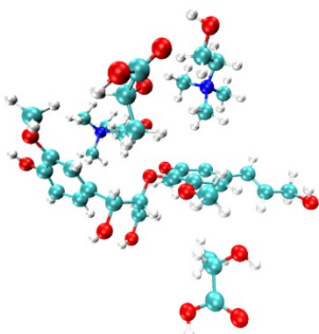

(d) G-S-Lac12

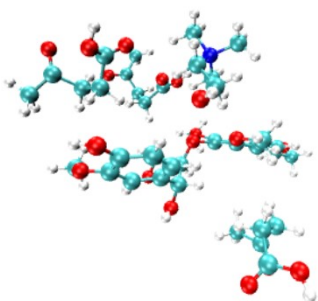

(e) G-S-Lev12

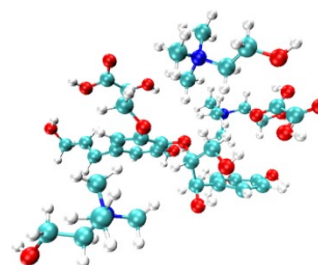

(f) G-S-Oxa11

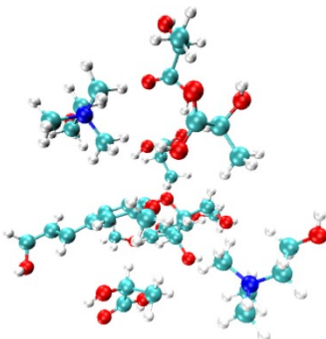

(g) S-G-Lac12

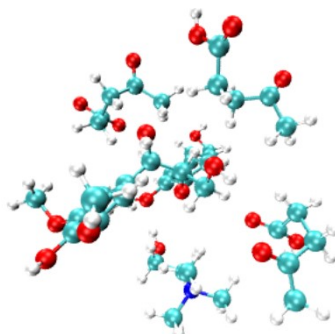

(h) S-G-Lev12

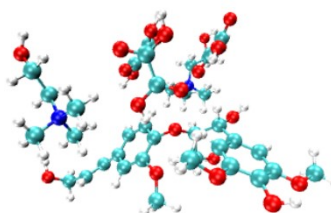

(i) S-G-Oxa11

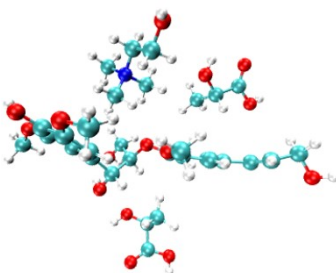

(j) S-S-Lac12

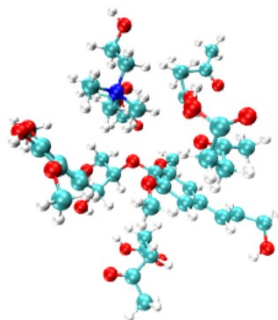

(k) S-S-Lev12

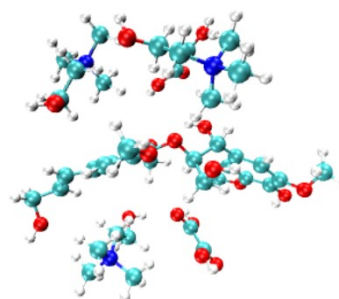

(l) S-S-Oxa11

**Figure S3.** the snapshots of the configuration used in DFT in which the  $\beta$ -O<sub>4</sub> present the largest SASA for the twelve systems. Color representations are the same as in Figure 1.

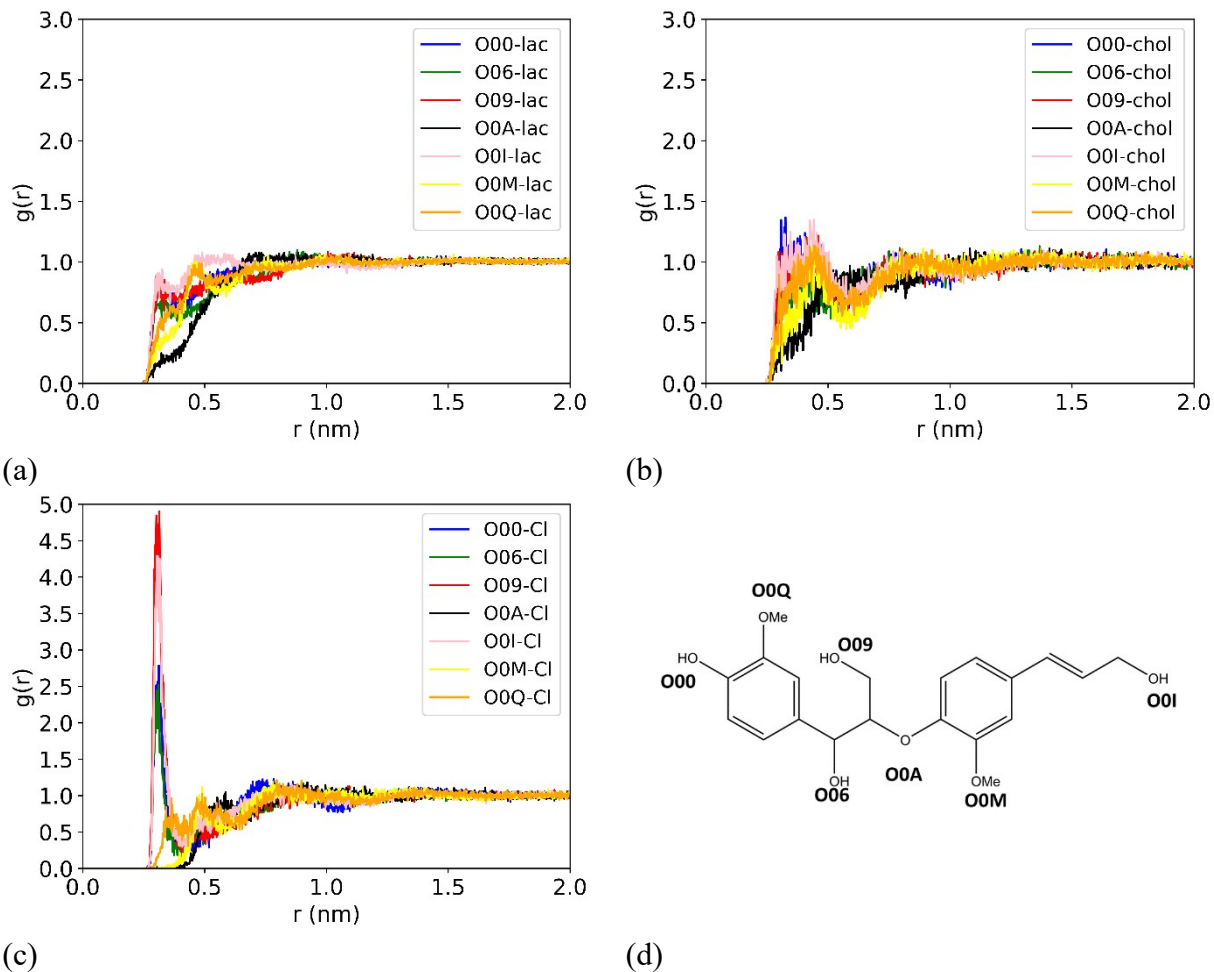

**Figure S4.** The radial distribution function (RDF) of seven oxygen atoms of G-G lignin dimer and (a) all oxygen atoms on lactic acid, (b) oxygen atom of choline and (c) Cl-. The seven oxygen atoms of G-G dimer used in RDF are labeled in (d).

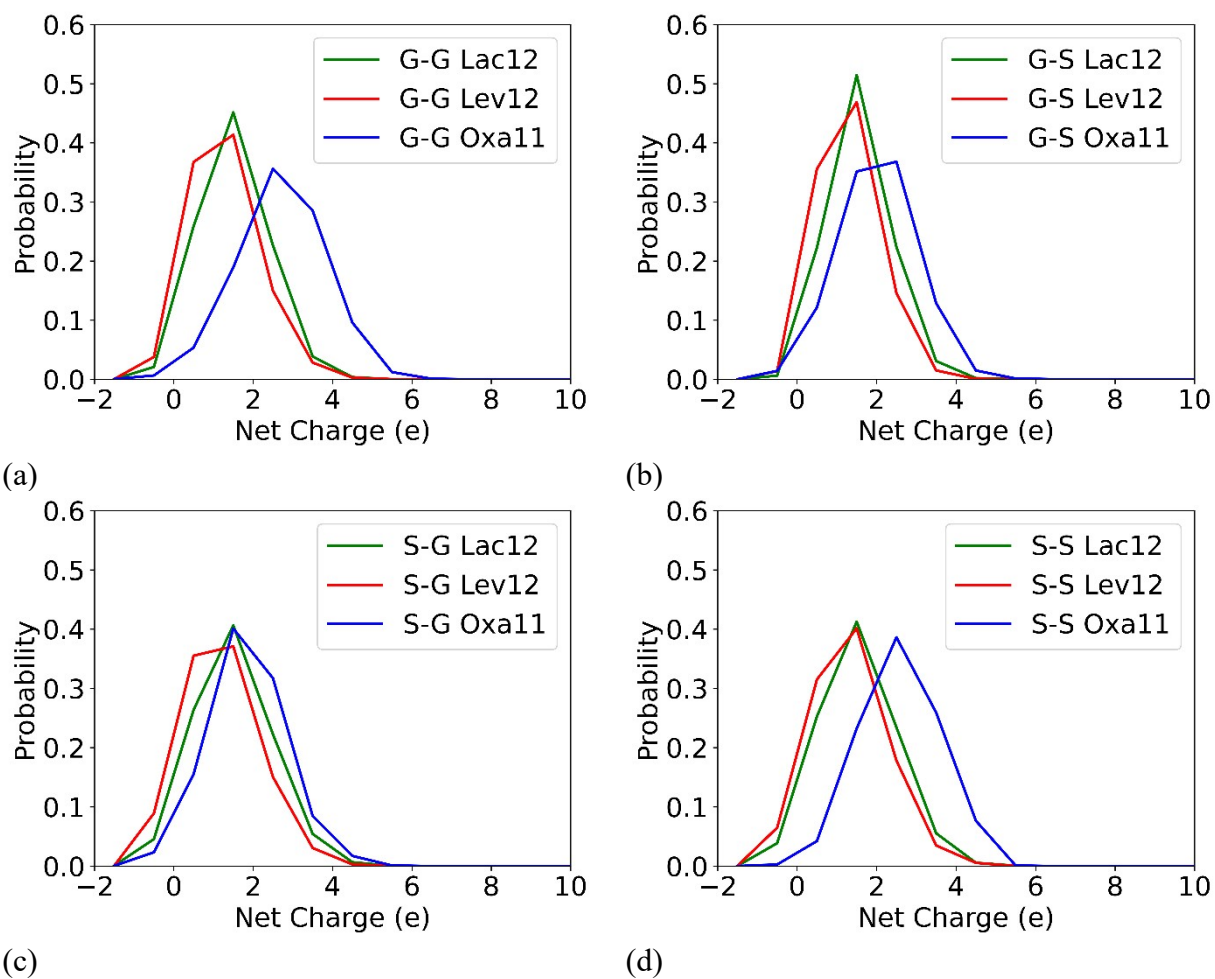

**Figure S5.** The distribution of net charge of the solvation shell around the  $\beta$ -O-4 linkage of (a) G-G, (b) G-S, (c) S-G and (d) S-S lignin dimers in three DESs.

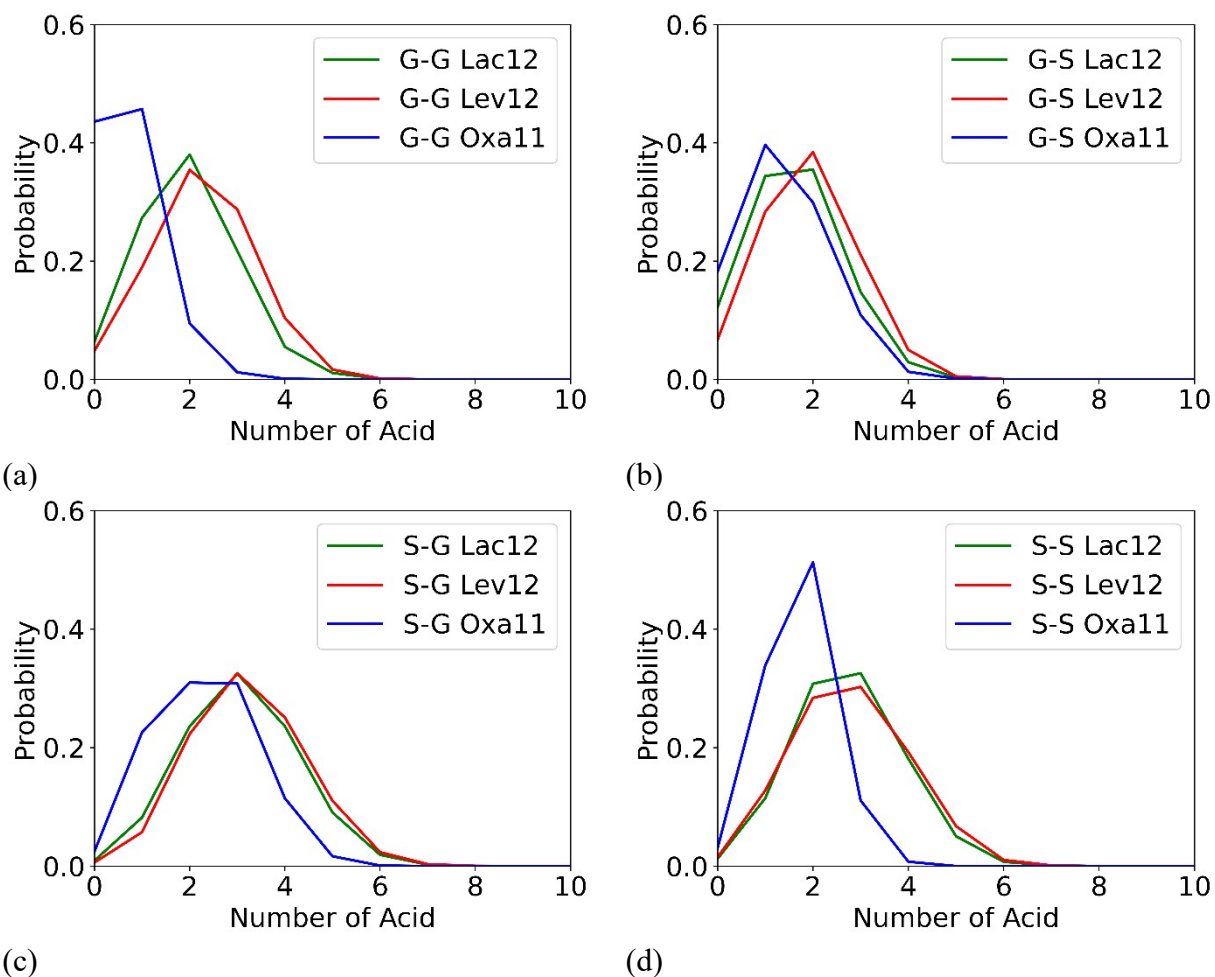

**Figure S6.** The distribution of acid molecules of the solvation shell around the  $\beta$ -O-4 linkage of (a) G-G, (b) G-S, (c) S-G and (d) S-S lignin dimers in three DESs.

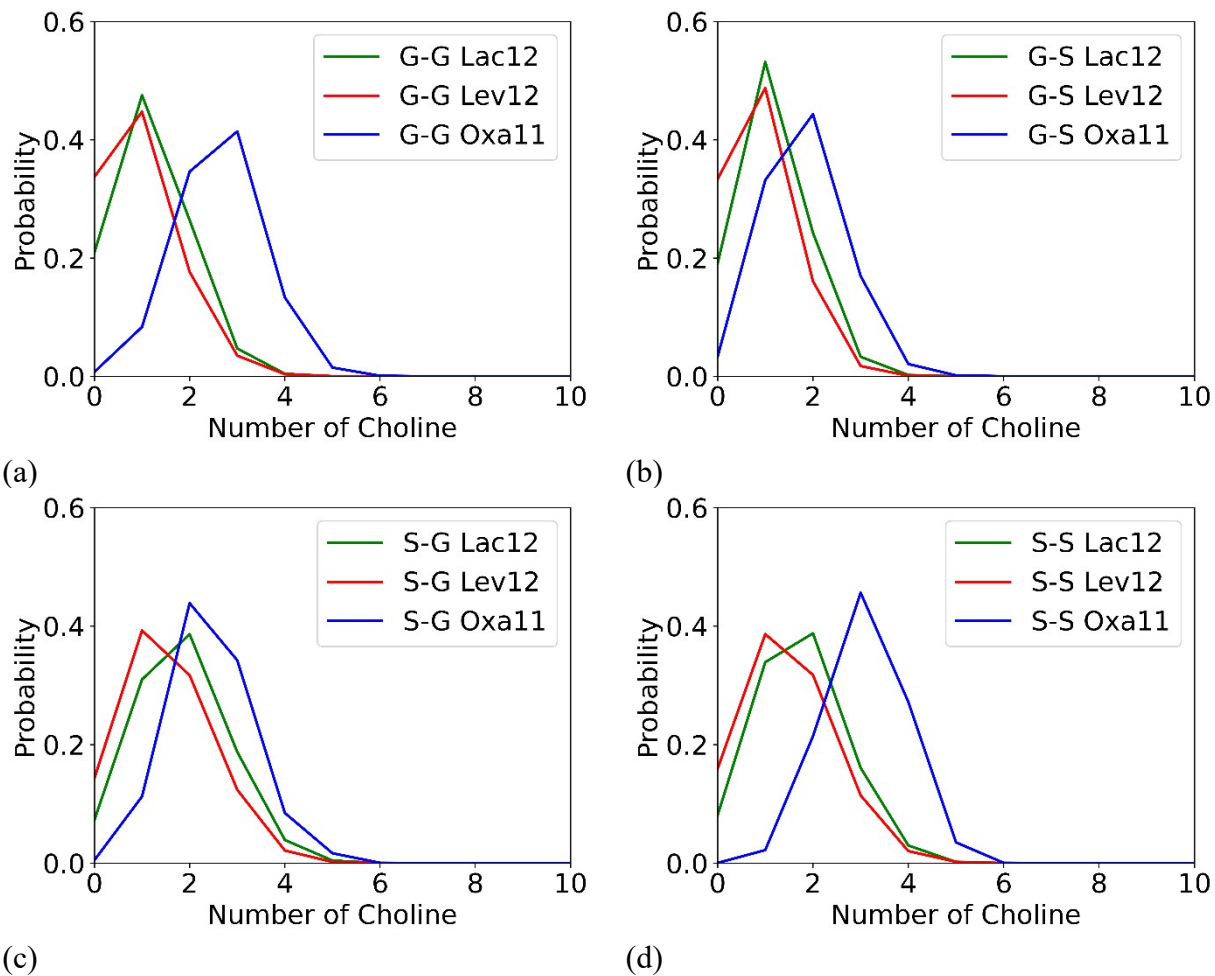

**Figure S7.** The distribution of choline molecules of the solvation shell around the  $\beta$ -O-4 linkage of (a) G-G, (b) G-S, (c) S-G and (d) S-S lignin dimers in three DESs.



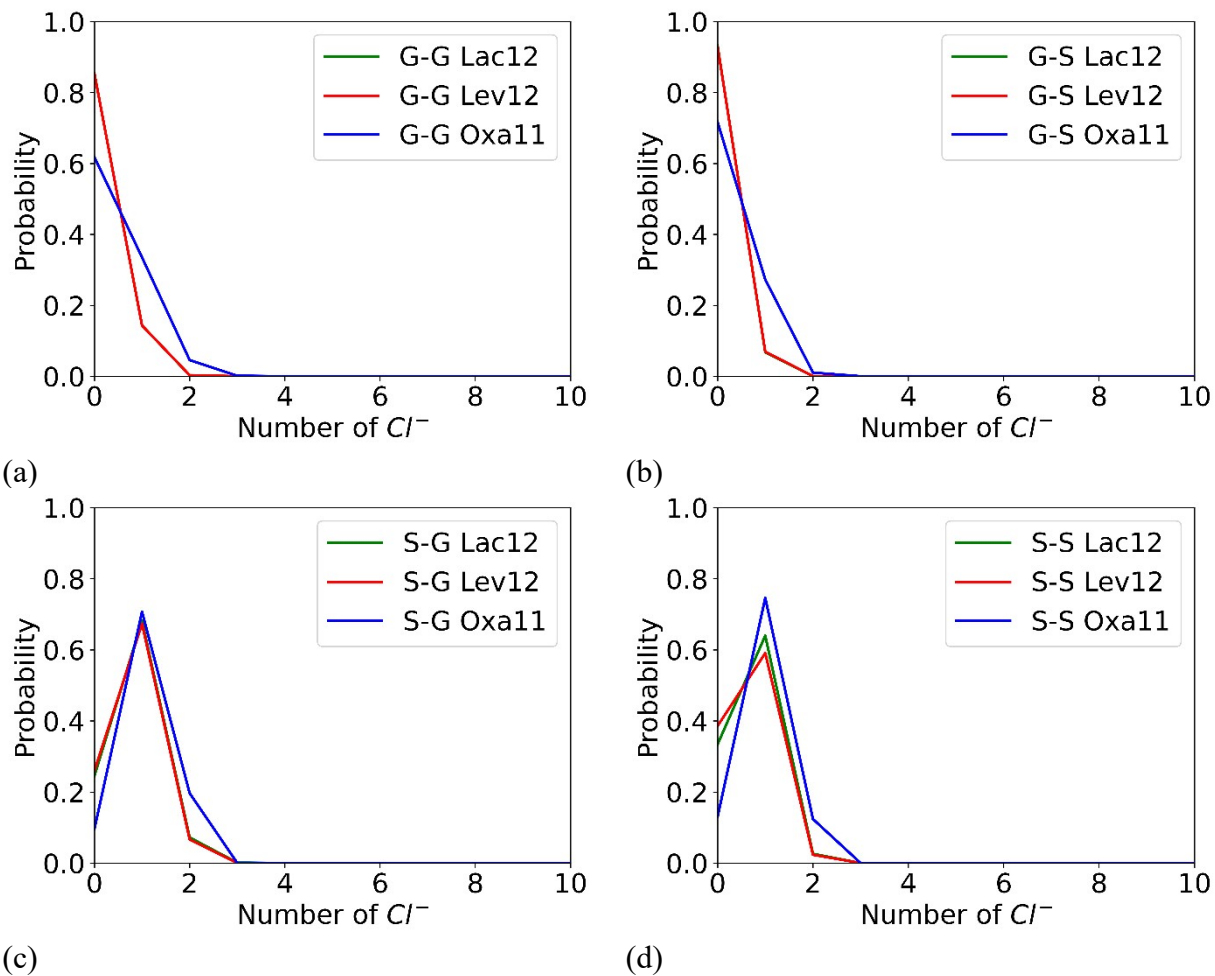

**Figure S8.** The distribution of  $Cl^-$  ions of the solvation shell around the  $\beta$ -O-4 linkage of (a) G-G, (b) G-S, (c) S-G and (d) S-S lignin dimers in three DESs.

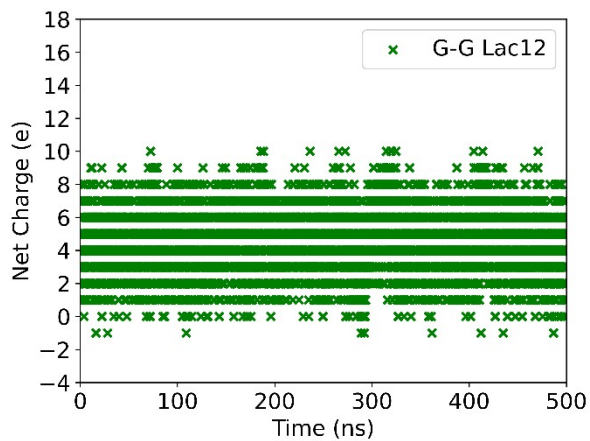

(a) G-G-Lac12

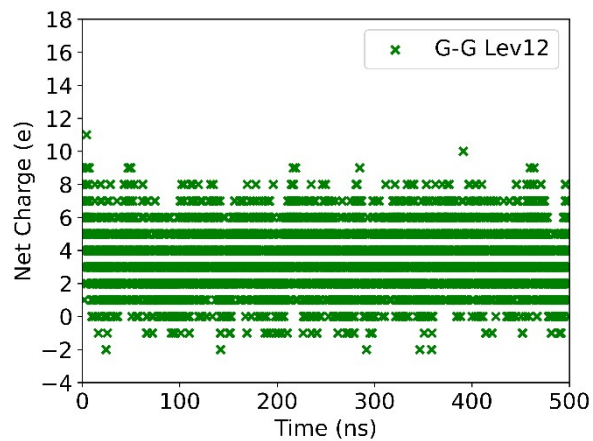

(b) G-G-Lev12

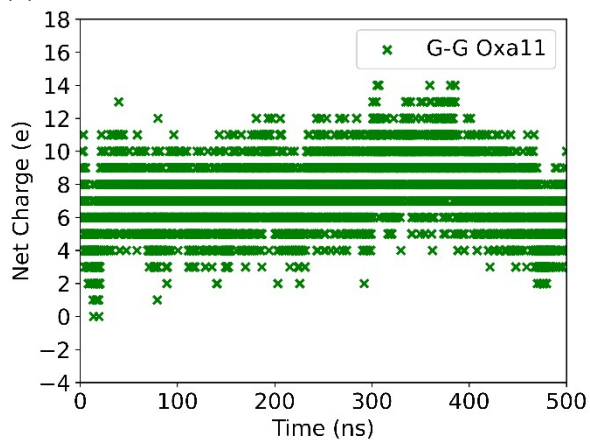

(c) G-G-Oxa11

**Figure S9.** The net charge of the solvation shell of G-G lignin dimer in the three DESs as a function of time.

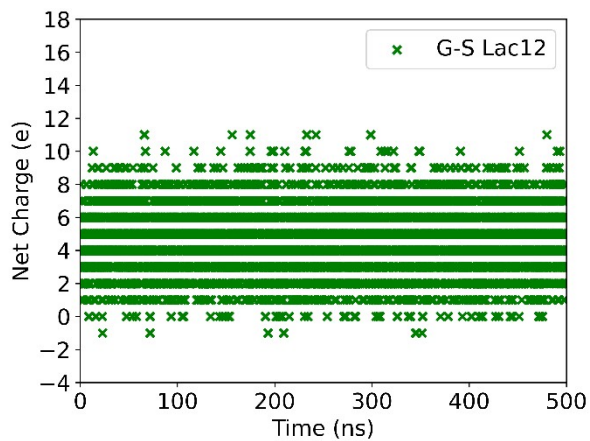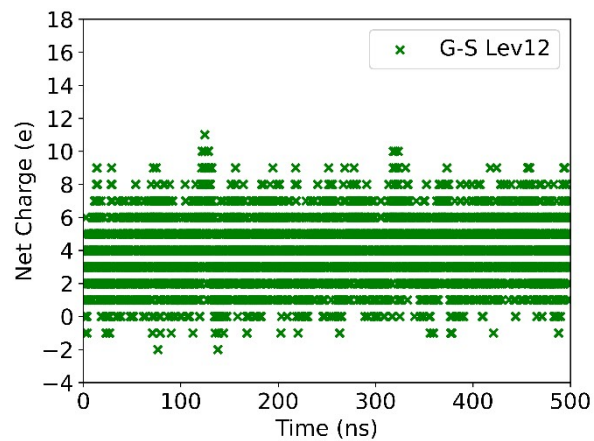

(a) G-S-Lac12

(b) G-S-Lev12

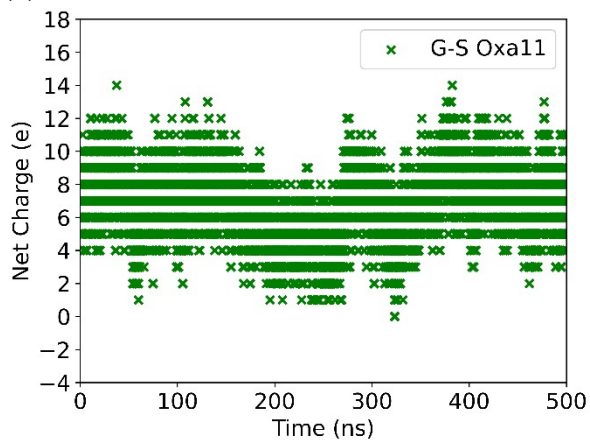

(c) G-S-Oxa11

**Figure S10.** The net charge of the solvation shell of G-S lignin dimer in the three DESs as a function of time.

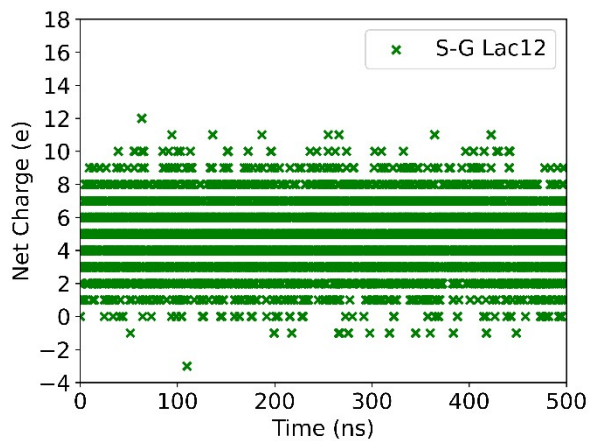

(a) S-G-Lac12

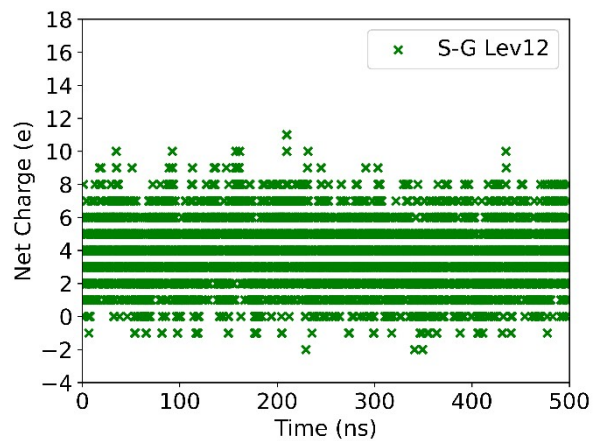

(b) S-G-Lev12

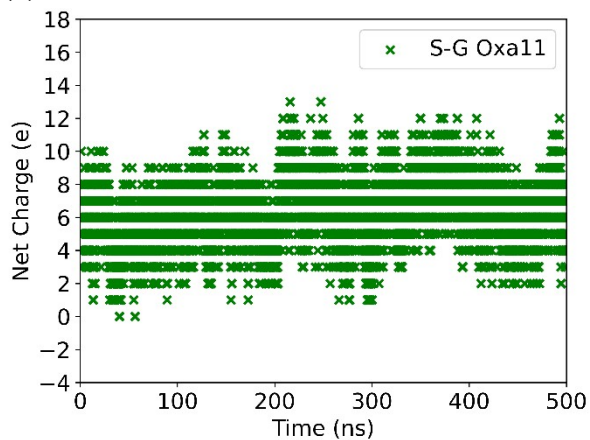

(c) S-G-Oxa11

**Figure S11.** The net charge of the solvation shell of S-G lignin dimer in the three DESs as a function of time.

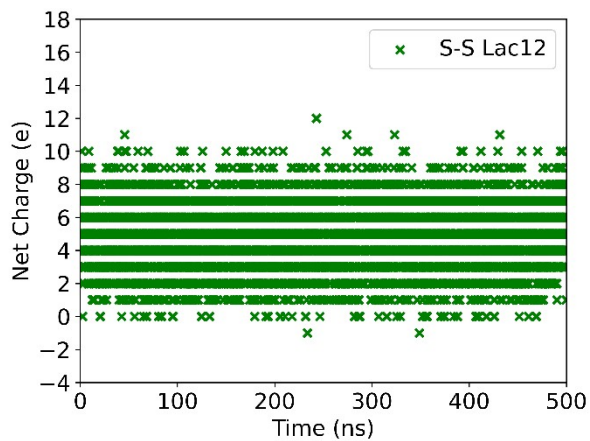

(a) S-S-Lac12

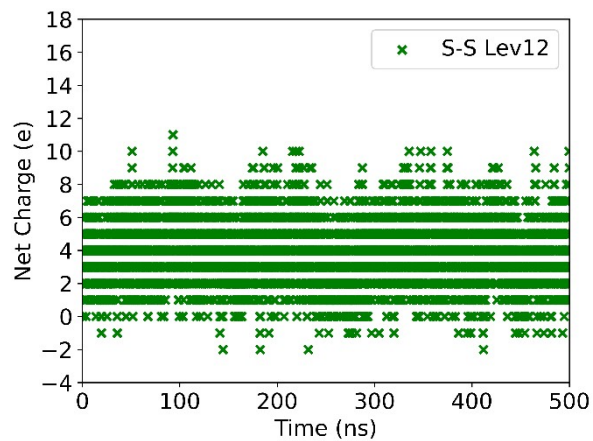

(b) S-S-Lev12

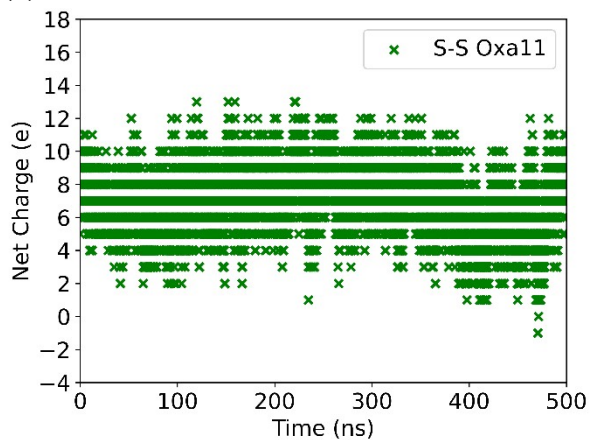

(c) S-S-Oxa11

**Figure S12.** The net charge of the solvation shell of S-S lignin dimer in the three DESs as a function of time.

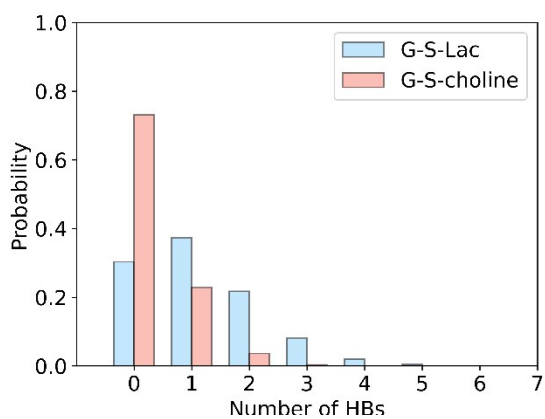

(a)

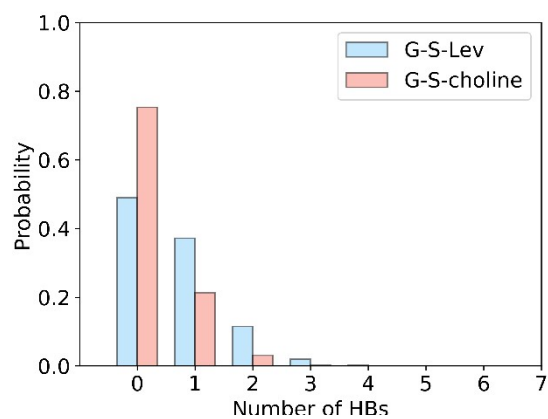

(b)

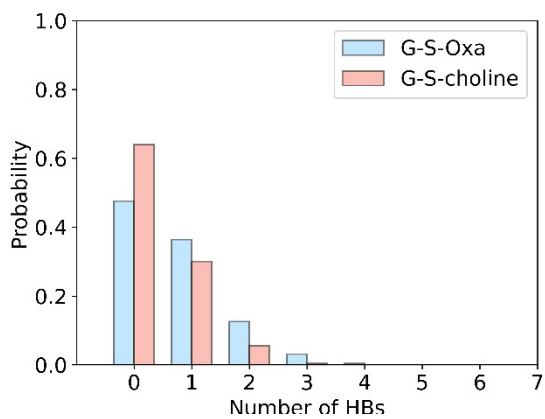

(c)

**Figure S13.** The distribution of HBs of lignin-acid and lignin-choline of (a) G-S Lac12, (b) G-S Lev12 and (c) G-S Oxa11.

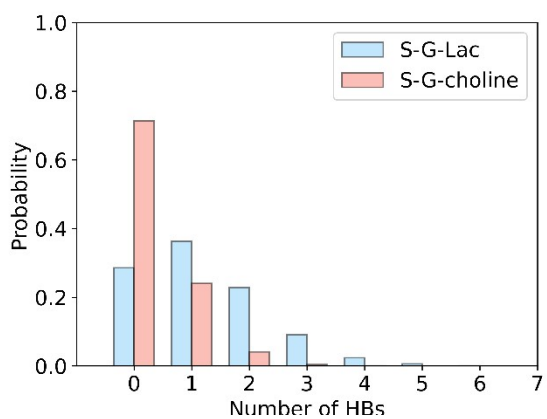

(a)

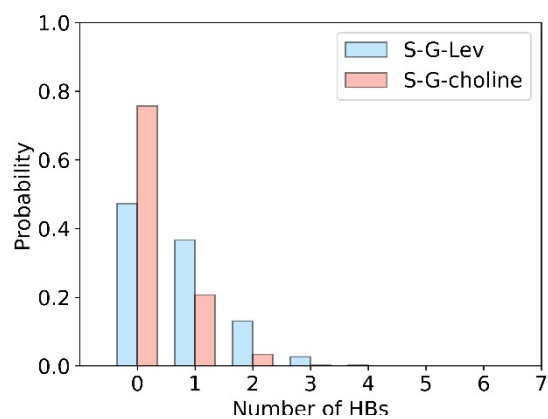

(b)

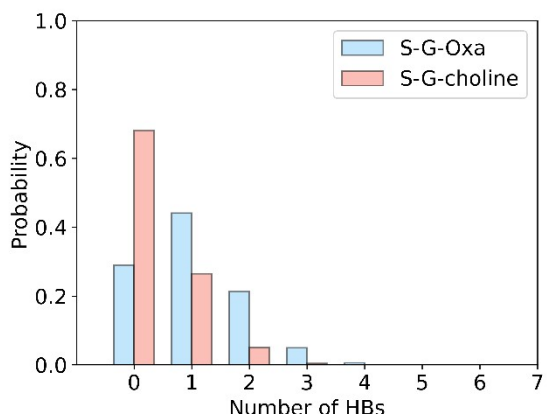

(c)

**Figure S14.** The distribution of HBs of lignin-acid and lignin-choline of (a) S-G Lac12, (b) S-G Lev12 and (c) S-G Oxa11.

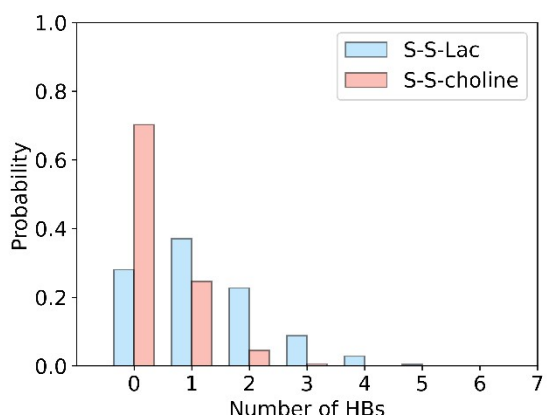

(a)

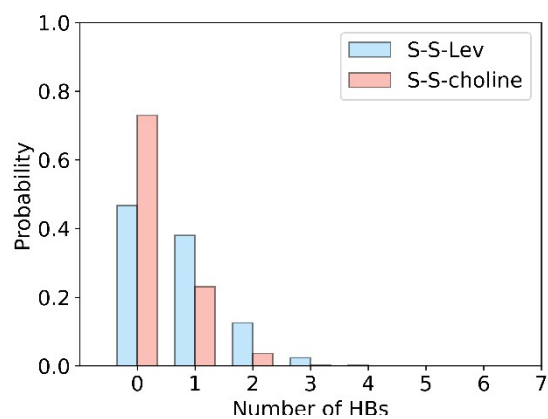

(b)

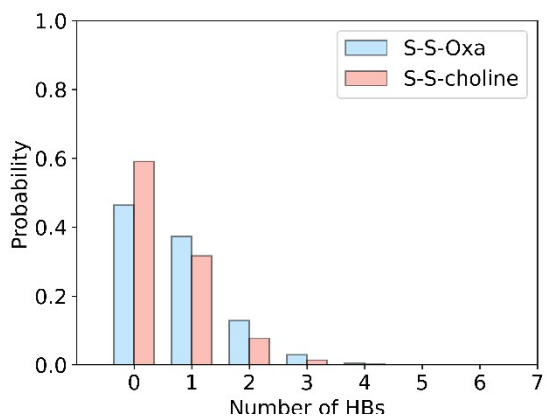

(c)

**Figure S15.** The distribution of HBs of lignin-acid and lignin-choline of (a) S-S Lac12, (b) S-S Lev12 and (c) S-S Oxa11.



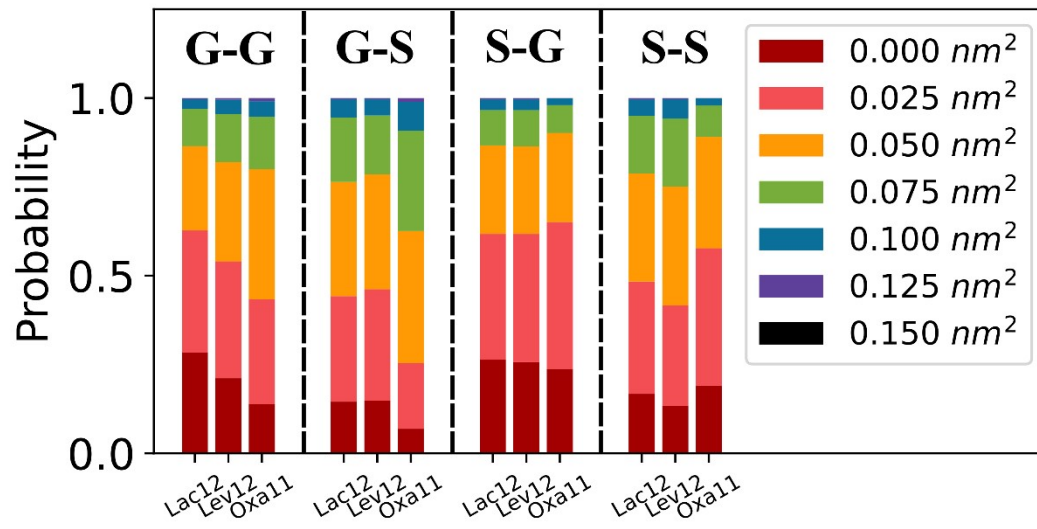

**Figure S16.** The distribution of SASA of  $\beta$ -O-4 for four types of lignin dimer in three DESs, the probe radius  $r=0.10$  nm.

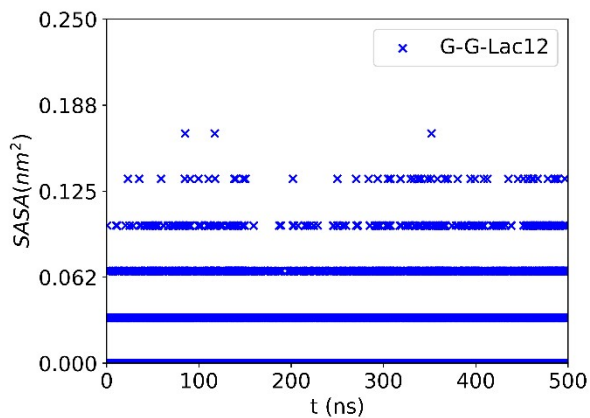

(a) G-G-Lac12

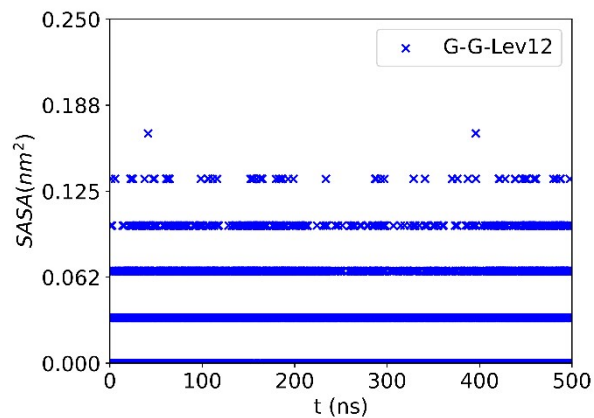

(b) G-G-Lev12

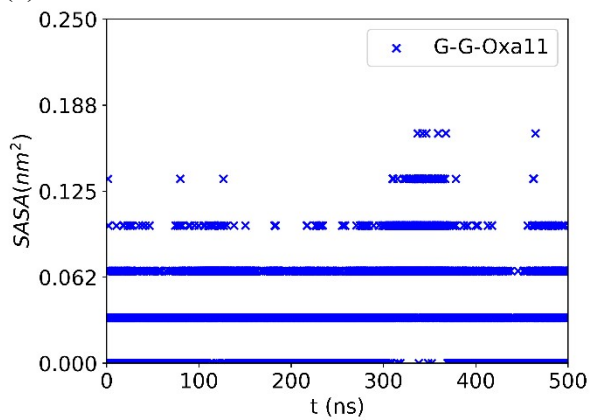

(c) G-G-Oxa11

**Figure S17.** The SASA of G-G lignin dimer in the three DESs as a function of time.

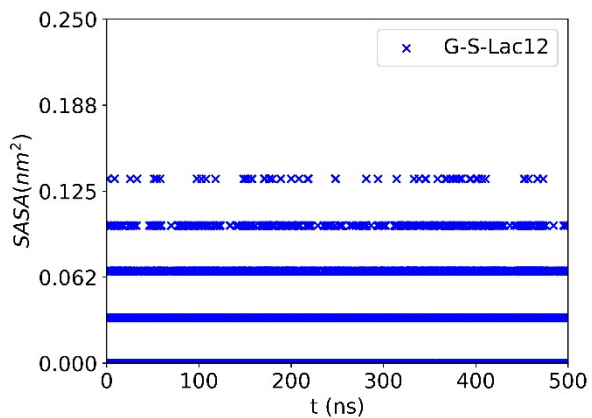

(a) G-S-Lac12

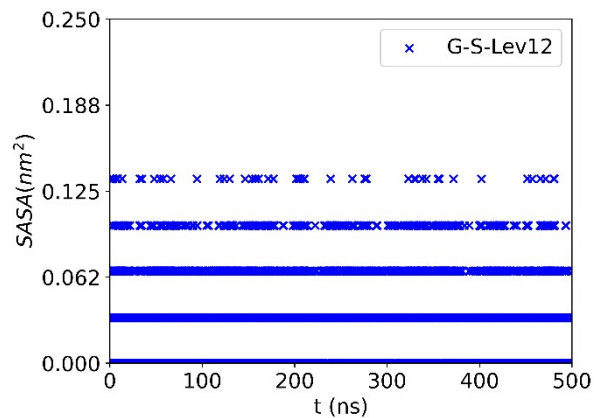

(b) G-S-Lev12

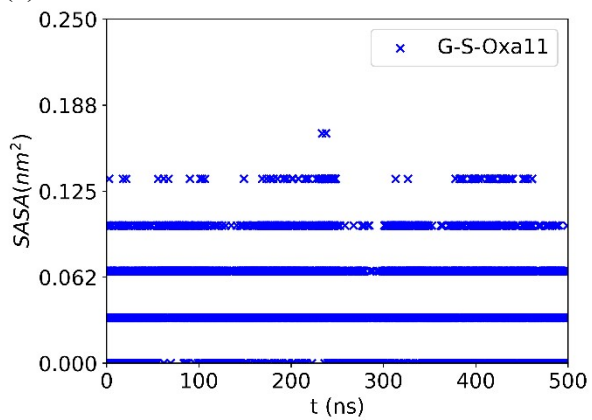

(c) G-S-Oxa11

**Figure S18.** The SASA of G-S lignin dimer in the three DESs as a function of time.

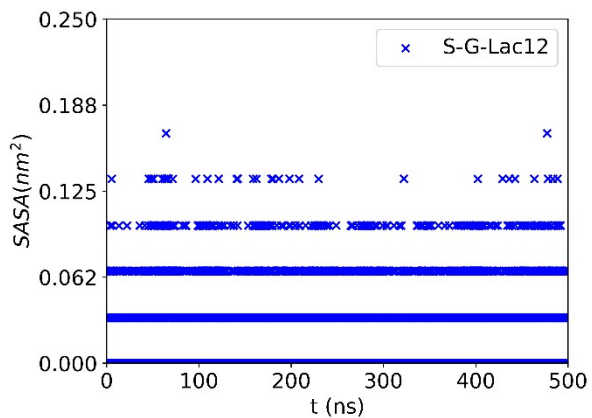

(a) S-G-Lac12

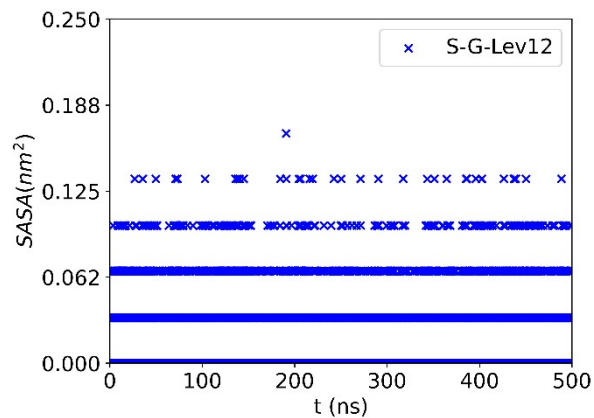

(b) S-G-Lev12

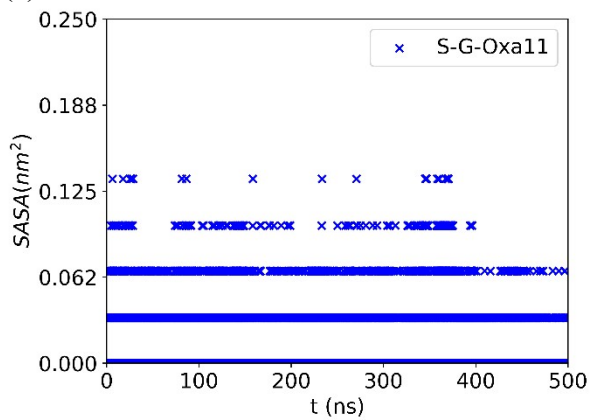

(c) S-G-Oxa11

**Figure S19.** The SASA of S-G lignin dimer in the three DESs as a function of time.

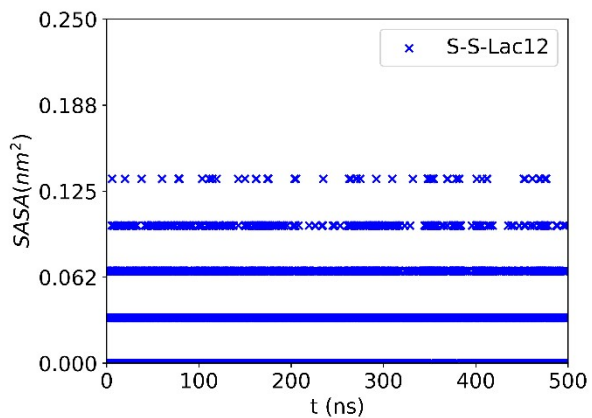

(a) S-S-Lac12

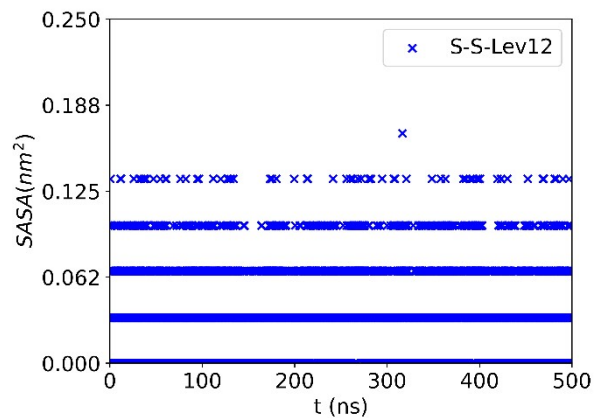

(b) S-S-Lev12

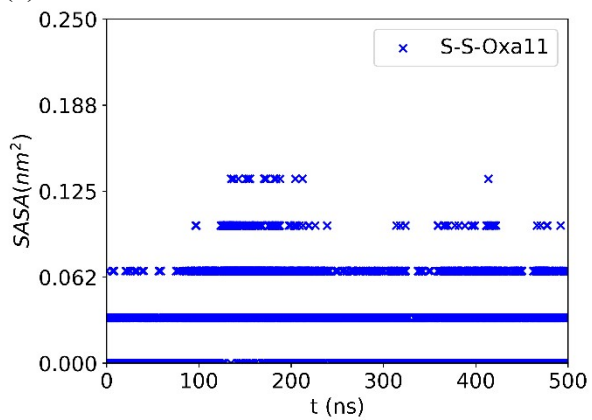

(c) S-S-Oxa11

**Figure S20.** The SASA of S-S lignin dimer in the three DESs as a function of time.

**Table S1.** The percentage of a negatively charged solvation shell for the lignin dimers in the three DESs.

|     | % of negatively charged solvation shell |       |       |
|-----|-----------------------------------------|-------|-------|
|     | Lac12                                   | Lev12 | Oxa11 |
| G-G | 0.09%                                   | 0.63% | 0     |
| G-S | 0.07%                                   | 0.28% | 0     |
| S-G | 0.14%                                   | 0.45% | 0     |
| S-S | 0.02%                                   | 0.39% | 0.01% |
